# Supplementary material for: Dysregulation of Key Proteins Associated with Sperm Motility and Fertility Potential in Cancer Patients
Source: MDPI journal article supplement (doi:10.3390/ijms21186754), 2020-09-15
Supplement: s1 [file s1]

## Western Blot Images

**Figure S1:** Western blot of NDUFS1 in spermatozoa of men with testicular cancer compared to fertile men.

**Figure S2:** Western blot of NDUFS1 in spermatozoa of men with hodgkin's disease compared to fertile men.

**Figure S3:** Western blot of NDUFS1 in spermatozoa of men with lymphoma compared to fertile men.

**Figure S4:** Western blot of NDUFS1 in spermatozoa of men with leukemia compared to fertile men.

**Figure S5:** Western blot of UQCRC2 in spermatozoa of men with testicular cancer compared to fertile men.

**Figure S6:** Western blot of UQCRC2 in spermatozoa of men with hodgkin's disease compared to fertile men.

**Figure S7:** Western blot of UQCRC2 in spermatozoa of men with lymphoma compared to fertile men.

**Figure S8:** Western blot of UQCRC2 in spermatozoa of men with leukemia compared to fertile men.

**Figure S9:** Western blot of SERPINA5 in spermatozoa of men with testicular cancer compared to fertile men.

**Figure S10:** Western blot of SERPINA5 in spermatozoa of men with hodgkin's disease compared to fertile men.

**Figure S11:** Western blot of SERPINA5 in spermatozoa of men with lymphoma compared to fertile men.

**Figure S12:** Western blot of SERPINA5 in spermatozoa of men with leukemia compared to fertile men.

**Figure S13:** Western blot of SOD1 in spermatozoa of men with testicular cancer compared to fertile men.

**Figure S14:** Western blot of SOD1 in spermatozoa of men with hodgkin's disease compared to fertile men.

**Figure S15:** Western blot of SOD1 in spermatozoa of men with lymphoma compared to fertile men.

**Figure S16:** Western blot of SOD1 in spermatozoa of men with leukemia compared to fertile men.

**Figure S1:**

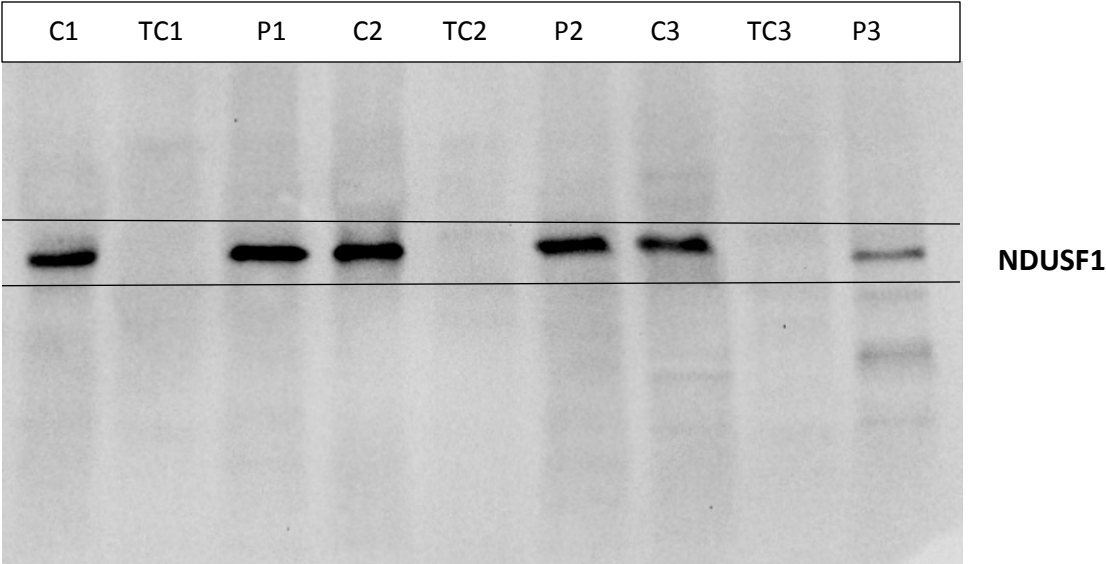

C: control group with fertile men, TC: testicular cancer, P: infertile men

**Note:** Expression profile of proteins from control group and testicular cancer group were only used for comparison in the current study.

**Figure S2:**

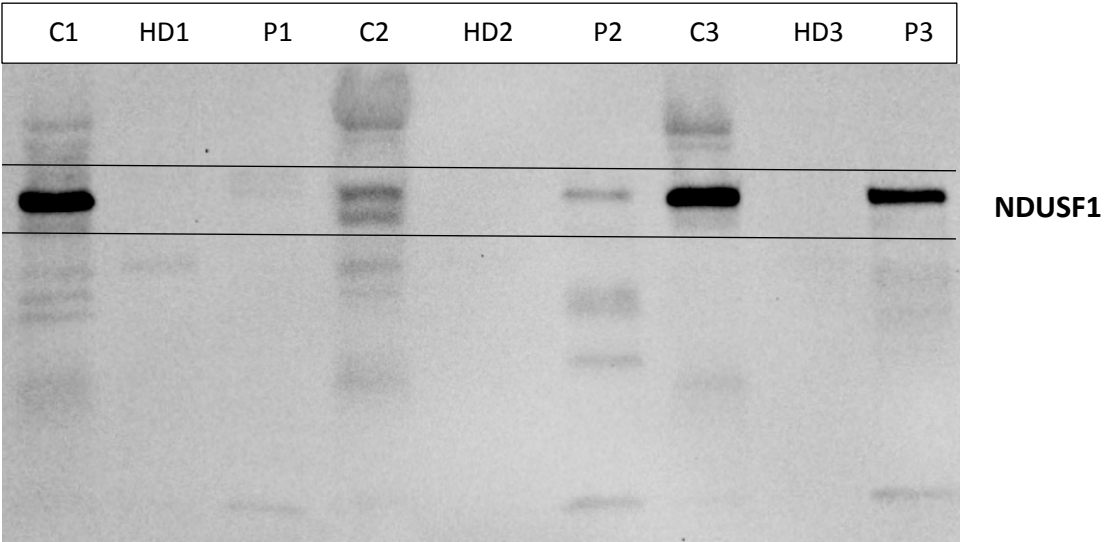

C: control group with fertile men, HD: hodgkin's disease, P: infertile men

**Note:** Expression profile of proteins from control group and hodgkin's disease group were only used for comparison in the current study.

**Figure S3:**

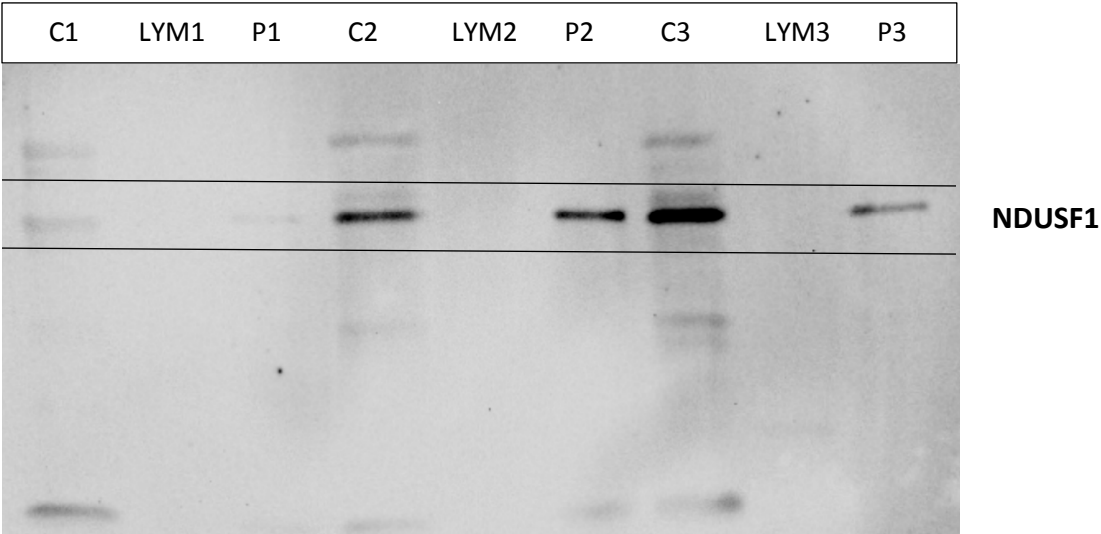

C: control group with fertile men, LYM: lymphoma, P: infertile men

**Note:** Expression profile of proteins from control group and lymphoma group were only used for comparison in the current study.

**Figure S4:**

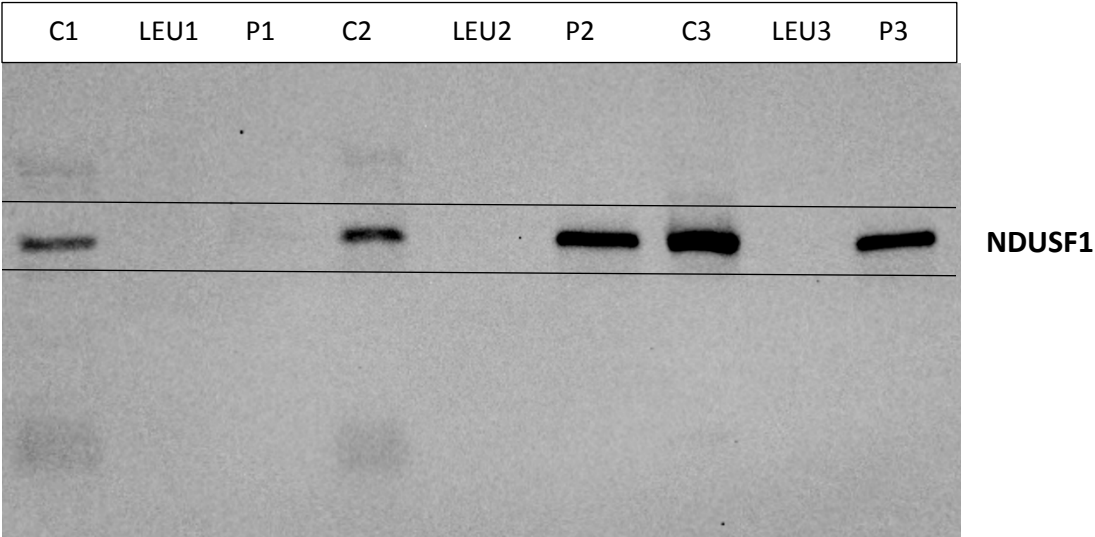

C: control group with fertile men, LEU: leukemia, P: infertile men

**Note:** Expression profile of proteins from control group and leukemia group were only used for comparison in the current study.

Figure S5:

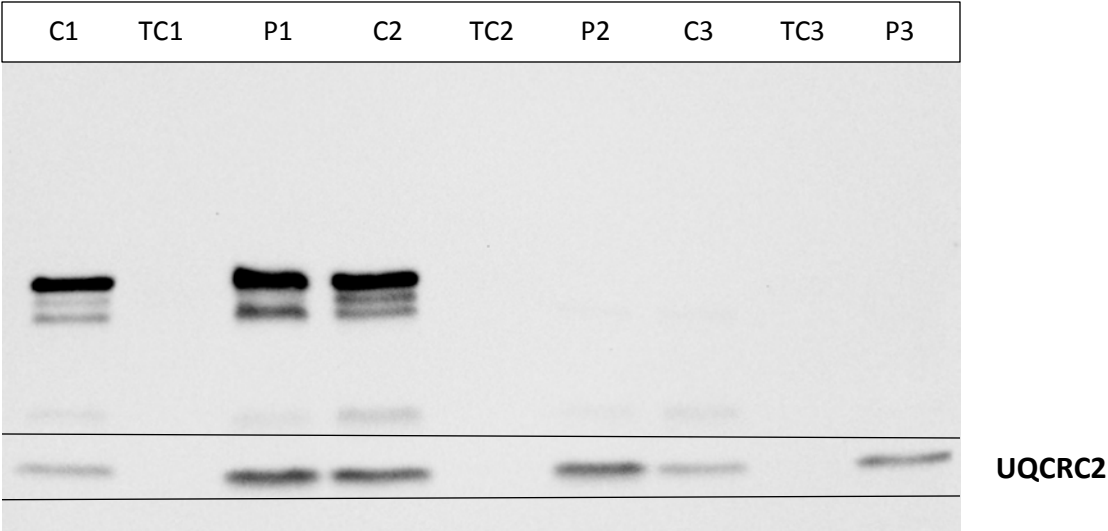

C: control group with fertile men, TC: testicular cancer, P: infertile men

**Note:** Expression profile of proteins from control group and testicular cancer group were only used for comparison in the current study.

Figure S6:

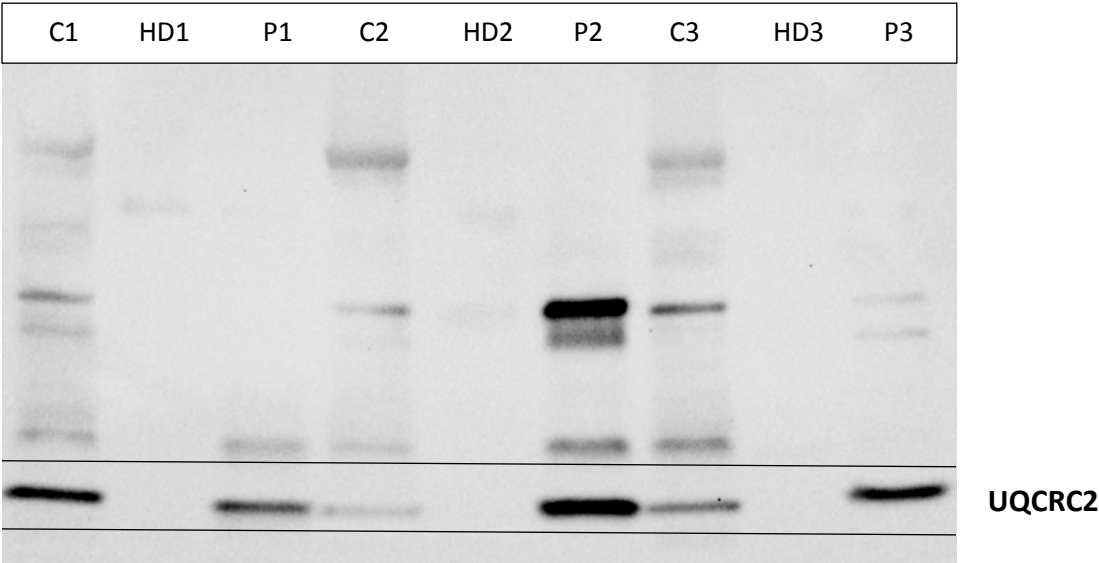

C: control group with fertile men, HD: hodgkin's disease, P: infertile men

**Note:** Expression profile of proteins from control group and hodgkin's disease group were only used for comparison in the current study.

**Figure S7:**

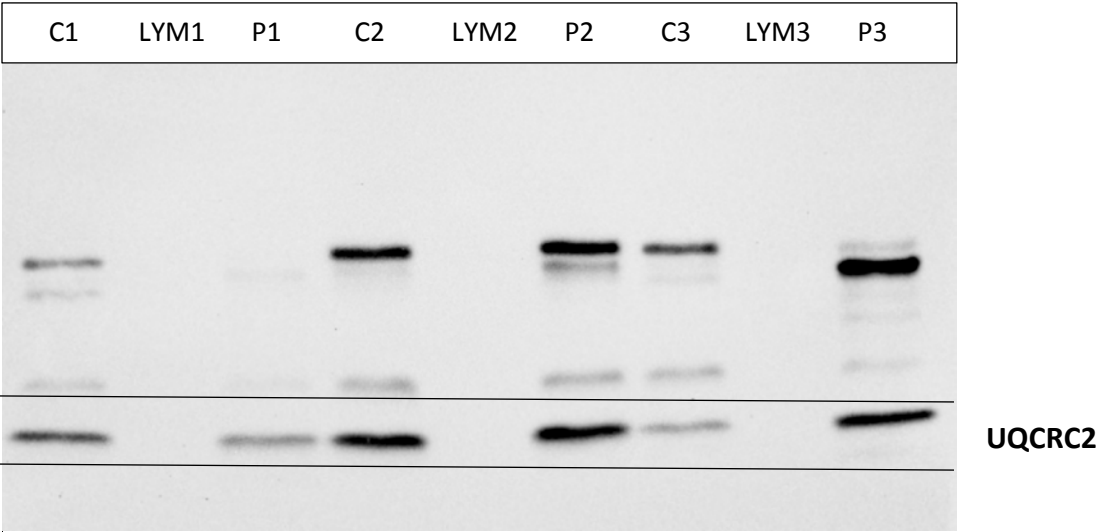

C: control group with fertile men, LYM: lymphoma, P: infertile men

**Note:** Expression profile of proteins from control group and lymphoma group were only used for comparison in the current study.

**Figure S8:**

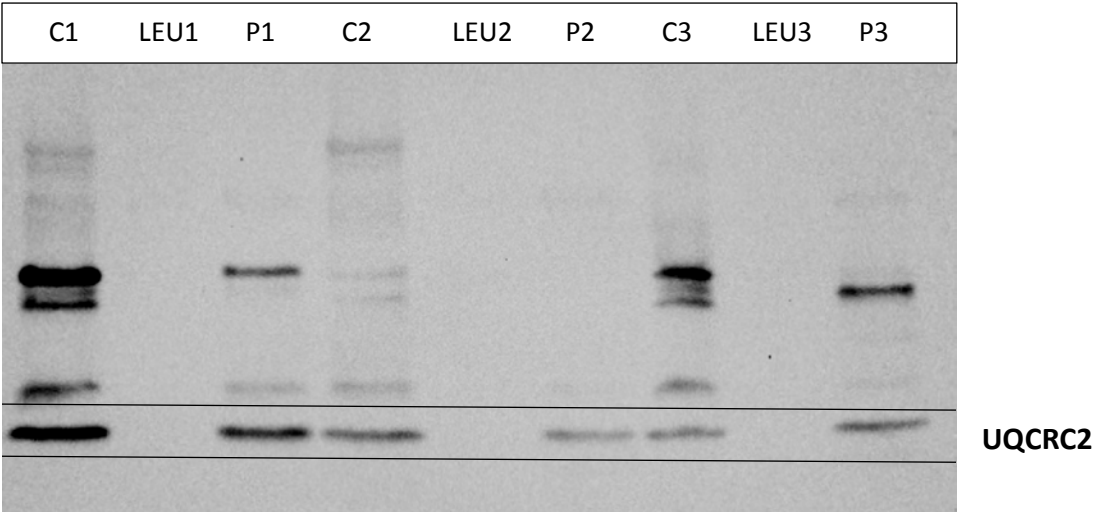

C: control group with fertile men, LEU: leukemia, P: infertile men

**Note:** Expression profile of proteins from control group and leukemia group were only used for comparison in the current study.

**Figure S9:**

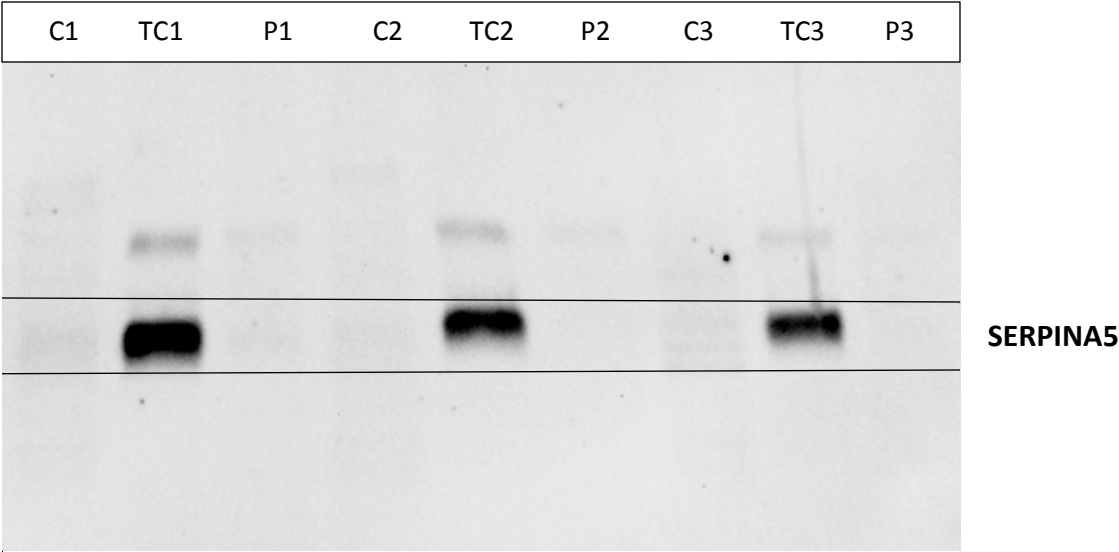

C: control group with fertile men, TC: testicular cancer, P: infertile men

**Note:** Expression profile of proteins from control group and testicular cancer group were only used for comparison in the current study.

**Figure S10:**

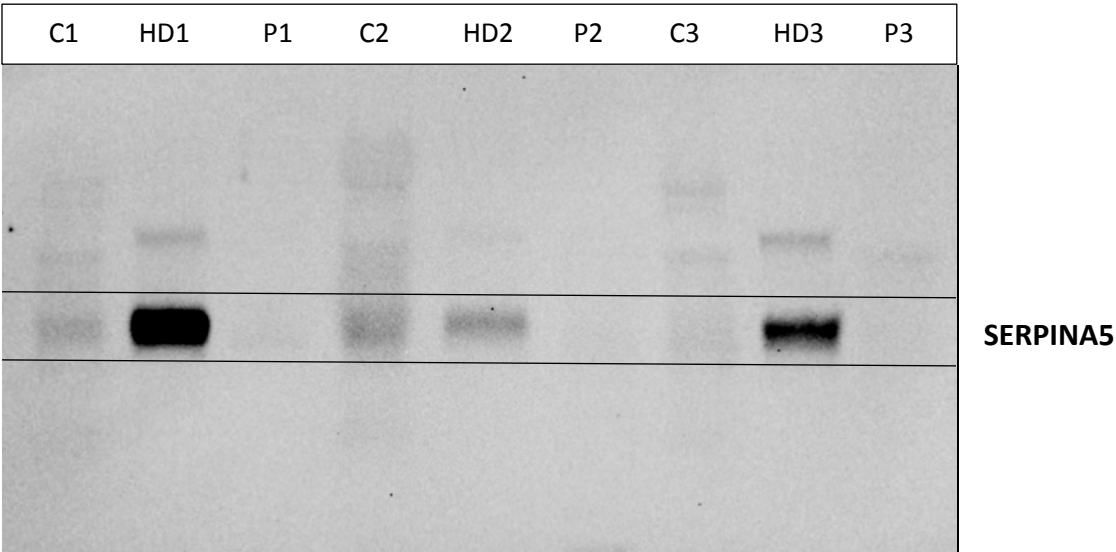

C: control group with fertile men, HD: hodgekin's disease, P: infertile men

**Note:** Expression profile of proteins from control group and hodgekin's disease group were only used for comparison in the current study.

**Figure S11:**

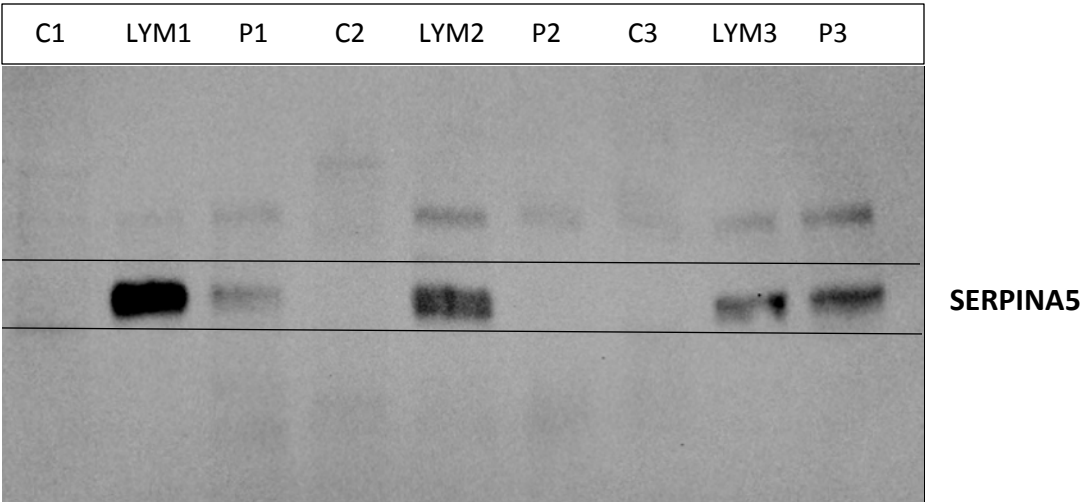

C: control group with fertile men, LYM: lymphoma, P: infertile men

**Note:** Expression profile of proteins from control group and lymphoma group were only used for comparison in the current study.

**Figure S12:**

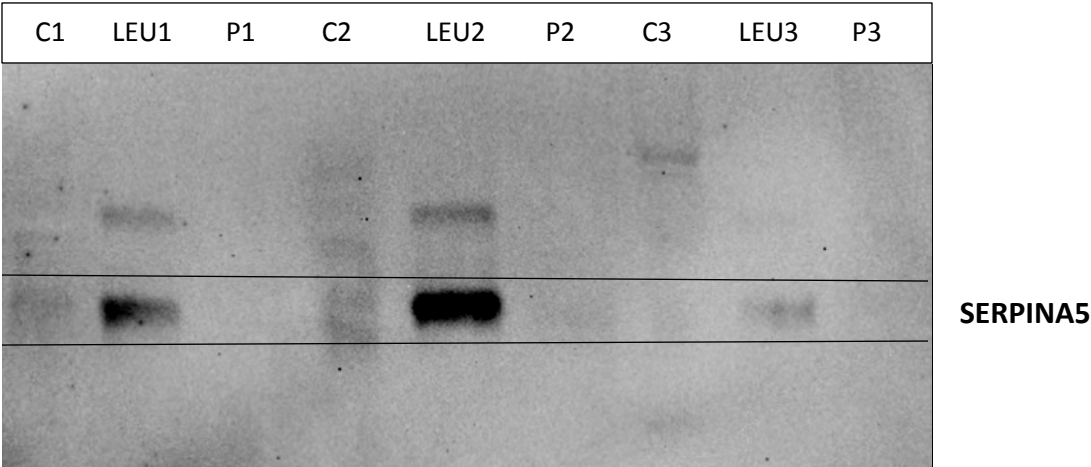

C: control group with fertile men, LEU: leukemia, P: infertile men

**Note:** Expression profile of proteins from control group and leukemia group were only used for comparison in the current study.



**Figure S13:**

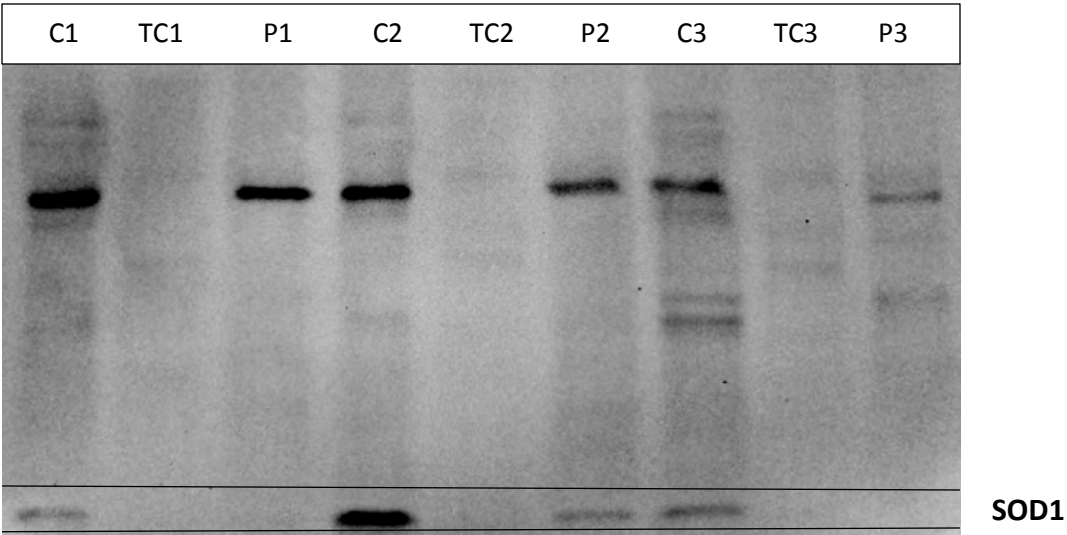

C: control group with fertile men, TC: testicular cancer, P: infertile men

**Note:** Expression profile of proteins from control group and testicular cancer group were only used for comparison in the current study.

**Figure S14:**

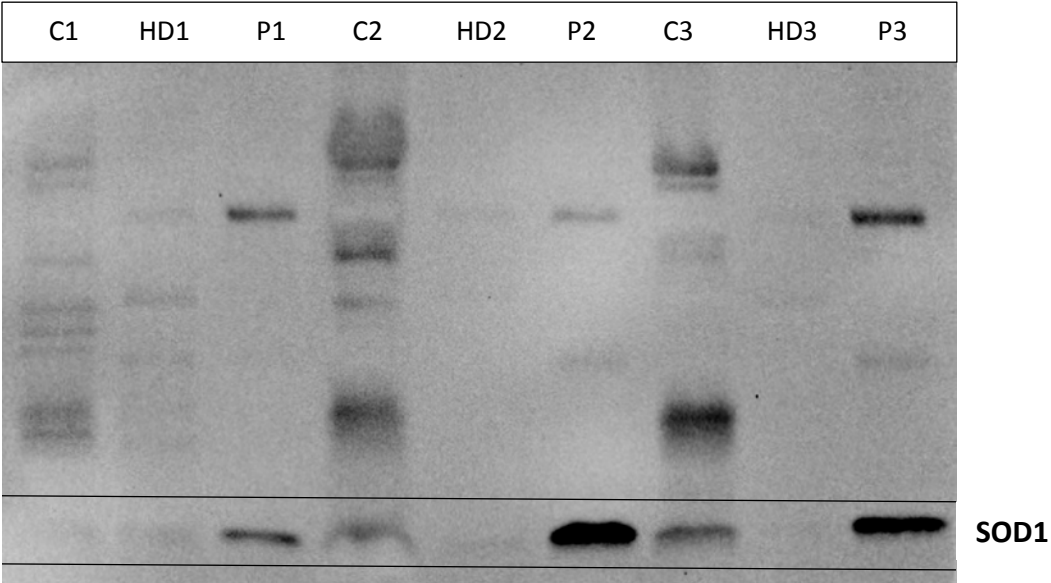

C: control group with fertile men, HD: hodgkin's disease, P: infertile men

**Note:** Expression profile of proteins from control group and hodgkin's disease group were only used for comparison in the current study.

| C1 | LYM1 | P1 | C2 | LYM2 | P2 | C3 | LYM3 | P3 |             |
|----|------|----|----|------|----|----|------|----|-------------|
|    |      |    |    |      |    |    |      |    |             |
|    |      |    |    |      |    |    |      |    | <b>SOD1</b> |

**Note:** Expression profile of proteins from control group and lymphoma group were only used for comparison in the current study.

| C1 | LEU1 | P1 | C2 | LEU2 | P2 | C3 | LEU3 | P3 |
|----|------|----|----|------|----|----|------|----|
|    |      |    |    |      |    |    |      |    |
|    |      |    |    |      |    |    |      |    |
|    |      |    |    |      |    |    |      |    |
|    |      |    |    |      |    |    |      |    |
|    |      |    |    |      |    |    |      |    |
|    |      |    |    |      |    |    |      |    |
|    |      |    |    |      |    |    |      |    |
|    |      |    |    |      |    |    |      |    |
|    |      |    |    |      |    |    |      |    |
|    |      |    |    |      |    |    |      |    |
|    |      |    |    |      |    |    |      |    |
|    |      |    |    |      |    |    |      |    |
|    |      |    |    |      |    |    |      |    |
|    |      |    |    |      |    |    |      |    |
|    |      |    |    |      |    |    |      |    |
|    |      |    |    |      |    |    |      |    |
|    |      |    |    |      |    |    |      |    |
|    |      |    |    |      |    |    |      |    |
|    |      |    |    |      |    |    |      |    |
|    |      |    |    |      |    |    |      |    |
|    |      |    |    |      |    |    |      |    |
|    |      |    |    |      |    |    |      |    |
|    |      |    |    |      |    |    |      |    |
|    |      |    |    |      |    |    |      |    |
|    |      |    |    |      |    |    |      |    |
|    |      |    |    |      |    |    |      |    |
|    |      |    |    |      |    |    |      |    |
|    |      |    |    |      |    |    |      |    |
|    |      |    |    |      |    |    |      |    |
|    |      |    |    |      |    |    |      |    |
|    |      |    |    |      |    |    |      |    |
|    |      |    |    |      |    |    |      |    |
|    |      |    |    |      |    |    |      |    |
|    |      |    |    |      |    |    |      |    |
|    |      |    |    |      |    |    |      |    |
|    |      |    |    |      |    |    |      |    |
|    |      |    |    |      |    |    |      |    |
|    |      |    |    |      |    |    |      |    |
|    |      |    |    |      |    |    |      |    |
|    |      |    |    |      |    |    |      |    |
|    |      |    |    |      |    |    |      |    |
|    |      |    |    |      |    |    |      |    |
|    |      |    |    |      |    |    |      |    |
|    |      |    |    |      |    |    |      |    |
|    |      |    |    |      |    |    |      |    |
|    |      |    |    |      |    |    |      |    |
|    |      |    |    |      |    |    |      |    |
|    |      |    |    |      |    |    |      |    |
|    |      |    |    |      |    |    |      |    |
|    |      |    |    |      |    |    |      |    |
|    |      |    |    |      |    |    |      |    |
|    |      |    |    |      |    |    |      |    |
|    |      |    |    |      |    |    |      |    |
|    |      |    |    |      |    |    |      |    |
|    |      |    |    |      |    |    |      |    |
|    |      |    |    |      |    |    |      |    |
|    |      |    |    |      |    |    |      |    |
|    |      |    |    |      |    |    |      |    |
|    |      |    |    |      |    |    |      |    |
|    |      |    |    |      |    |    |      |    |
|    |      |    |    |      |    |    |      |    |
|    |      |    |    |      |    |    |      |    |
|    |      |    |    |      |    |    |      |    |
|    |      |    |    |      |    |    |      |    |
|    |      |    |    |      |    |    |      |    |
|    |      |    |    |      |    |    |      |    |
|    |      |    |    |      |    |    |      |    |
|    |      |    |    |      |    |    |      |    |
|    |      |    |    |      |    |    |      |    |
|    |      |    |    |      |    |    |      |    |
|    |      |    |    |      |    |    |      |    |
|    |      |    |    |      |    |    |      |    |
|    |      |    |    |      |    |    |      |    |
|    |      |    |    |      |    |    |      |    |
|    |      |    |    |      |    |    |      |    |
|    |      |    |    |      |    |    |      |    |
|    |      |    |    |      |    |    |      |    |
|    |      |    |    |      |    |    |      |    |
|    |      |    |    |      |    |    |      |    |
|    |      |    |    |      |    |    |      |    |
|    |      |    |    |      |    |    |      |    |
|    |      |    |    |      |    |    |      |    |
|    |      |    |    |      |    |    |      |    |
|    |      |    |    |      |    |    |      |    |
|    |      |    |    |      |    |    |      |    |

**Note:** Expression profile of proteins from control group and leukemia group were only used for comparison in the current study.
