# Supplementary material for: Dysregulation of Key Proteins Associated with Sperm Motility and Fertility Potential in Cancer Patients
Source: Int J Mol Sci. 2020 Sep 15;21(18):6754. doi: 10.3390/ijms21186754 (PMC7554694; doi:10.3390/ijms21186754)
Supplement: Supplementary file 1 [file ijms-21-06754-s001.zip › ijms-884747_Supplementary Files/ijms-884747-Table S2.xlsx]

## Sheet: DEPs
Supplementary table 2: List of the differentially expressed proteins identified by the bioinformatic analysis when comparing the sperm proteome cancer group with fertile men (control).
SN	Protein	Accession	Average SC		Abundance		NSAF ratio	t-test	Expression
			Cancer Group	Fertile Men Group	Cancer Group	Fertile Men Group	Cancer Group/Fertile Men	P-value
1	ATP synthase subunit s, mitochondrial isoform X3	530403525	0	22.3333	ni	M	0	2.44134e-07	Unique to Fertile
2	26S proteasome non-ATPase regulatory subunit 2 isoform 1	25777602	0	55.3333	ni	M	0	3.47241e-07	Unique to Fertile
3	diablo homolog, mitochondrial isoform 1 precursor	9845297	0	23.3333	ni	M	0	6.06461e-07	Unique to Fertile
4	NADH dehydrogenase [ubiquinone] 1 alpha subcomplex subunit 9, mitochondrial precursor	6681764	0	33.6667	ni	M	0	7.90313e-07	Unique to Fertile
5	nuclear pore complex protein Nup155 isoform 1	24430149	0	53.6667	ni	M	0	1.20448e-06	Unique to Fertile
6	carboxypeptidase D isoform 1 precursor	22202611	0	46.6667	ni	M	0	1.21251e-06	Unique to Fertile
7	leucine-rich repeat-containing protein 37A2 precursor	116325993	0	27	ni	M	0	1.08412e-05	Unique to Fertile
8	ubiquitin-like modifier-activating enzyme 1 isoform X1	530421539	0	68.6667	ni	M	0	1.1502e-05	Unique to Fertile
9	doublecortin domain-containing protein 2C	566006166	0	28	ni	M	0	1.29795e-05	Unique to Fertile
10	ATP-citrate synthase isoform X2	530412284	0	25.6667	ni	M	0	1.35341e-05	Unique to Fertile
11	heat shock 70 protein 4L	31541941	0	61	ni	M	0	1.36274e-05	Unique to Fertile
12	casein kinase II subunit alpha isoform X1	578835362	0	40.3333	ni	M	0	2.23891e-05	Unique to Fertile
13	multifunctional protein ADE2 isoform 2	5453539	0	25.3333	ni	M	0	2.88433e-05	Unique to Fertile
14	fatty acid-binding protein, epidermal	4557581	0	33.3333	ni	M	0	3.25033e-05	Unique to Fertile
15	glutamine synthetase isoform X1	578800828	0	26	ni	M	0	3.70856e-05	Unique to Fertile
16	3-mercaptopyruvate sulfurtransferase isoform 1	194473668	0	23.6667	ni	M	0	3.92685e-05	Unique to Fertile
17	elongation factor 2	4503483	0	70	ni	M	0	4.17765e-05	Unique to Fertile
18	LETM1 and EF-hand domain-containing protein 1, mitochondrial precursor	6912482	0	27.6667	ni	M	0	4.52138e-05	Unique to Fertile
19	alpha-mannosidase 2C1 isoform 2	374532775	0	47	ni	M	0	5.17113e-05	Unique to Fertile
20	tetratricopeptide repeat protein 25	13899233	0	26	ni	M	0	5.42502e-05	Unique to Fertile
21	26S proteasome non-ATPase regulatory subunit 1 isoform 2	300388183	0	62	ni	M	0	7.40933e-05	Unique to Fertile
22	acyl-CoA dehydrogenase family member 9, mitochondrial	21361497	0	41.6667	ni	M	0	7.81828e-05	Unique to Fertile
23	lon protease homolog, mitochondrial isoform 1 precursor	21396489	0	41.6667	ni	M	0	0.000100993	Unique to Fertile
24	exportin-7	154448892	0	24.3333	ni	M	0	0.00014798	Unique to Fertile
25	beta-galactosidase-1-like protein isoform X1	530370954	0	39	ni	M	0	0.000155023	Unique to Fertile
26	mitochondrial import receptor subunit TOM40 homolog	193083120	0	22.6667	ni	M	0	0.000179236	Unique to Fertile
27	short/branched chain specific acyl-CoA dehydrogenase, mitochondrial precursor	4501859	0	20	ni	M	0	0.00020204	Unique to Fertile
28	thioredoxin domain-containing protein 3	148839372	0	21.3333	ni	M	0	0.000291472	Unique to Fertile
29	exportin-2 isoform 1	29029559	0	29.3333	ni	M	0	0.000352199	Unique to Fertile
30	dynactin subunit 1 isoform 5	299890871	0	32.6667	ni	M	0	0.000357746	Unique to Fertile
31	dynein light chain 1, axonemal isoform 1	164607156	0	25.6667	ni	M	0	0.000428823	Unique to Fertile
32	cysteine desulfurase, mitochondrial isoform a precursor	32307132	0	36	ni	M	0	0.000431287	Unique to Fertile
33	dnaJ homolog subfamily B member 1	5453690	0	20	ni	M	0	0.000632339	Unique to Fertile
34	armadillo repeat-containing protein 4 isoform X3	578818430	0	24.6667	ni	M	0	0.00108724	Unique to Fertile
35	calcium-binding mitochondrial carrier protein Aralar1	21361103	0	25	ni	M	0	0.00180408	Unique to Fertile
36	vesicle-fusing ATPase isoform X1	578831007	0	28.3333	ni	M	0	0.00259041	Unique to Fertile
37	mannosyl-oligosaccharide glucosidase isoform 1	149999606	0	24.3333	ni	M	0	0.00467211	Unique to Fertile
38	dnaJ homolog subfamily A member 4 isoform 1	194328758	0	20.6667	ni	M	0	0.00754222	Unique to Fertile
39	carnitine O-palmitoyltransferase 1, muscle isoform isoform c	223468670	0	8.66667	ni	L	0	2.75071e-06	Unique to Fertile
40	normal mucosa of esophagus-specific gene 1 protein	14165280	0	15.3333	ni	L	0	3.10825e-06	Unique to Fertile
41	leucine-rich repeat-containing protein 37A3 isoform X2	530429826	0	12.6667	ni	L	0	5.00796e-06	Unique to Fertile
42	membrane metallo-endopeptidase-like 1	239049391	0	12.3333	ni	L	0	7.24571e-06	Unique to Fertile
43	nardilysin isoform a	156071450	0	9.66667	ni	L	0	7.63621e-06	Unique to Fertile
44	alpha-soluble NSF attachment protein	47933379	0	10.3333	ni	L	0	7.73283e-06	Unique to Fertile
45	translocation protein SEC63 homolog	6005872	0	13.3333	ni	L	0	8.92888e-06	Unique to Fertile
46	60S ribosomal protein L7	15431301	0	10.3333	ni	L	0	2.27705e-05	Unique to Fertile
47	CMT1A duplicated region transcript 15 protein	56090618	0	8	ni	L	0	2.94551e-05	Unique to Fertile
48	coiled-coil domain-containing protein 63 isoform X2	578823378	0	12	ni	L	0	4.1057e-05	Unique to Fertile
49	zona pellucida-binding protein 1 isoform 1 precursor	229577313	84.3333	300.667	ni	H	0.684547	0.00276584	Unique to Fertile
50	dynein intermediate chain 2, axonemal isoform X4	530412670	0	17.6667	ni	L	0	4.27261e-05	Unique to Fertile
51	fibronectin isoform 3 preproprotein	16933542	0	11.3333	ni	L	0	5.90102e-05	Unique to Fertile
52	mitochondrial carrier homolog 2	7657347	0	18.3333	ni	L	0	5.91905e-05	Unique to Fertile
53	mannose-6-phosphate isomerase isoform 1	4505235	0	15	ni	L	0	6.84035e-05	Unique to Fertile
54	casein kinase I isoform alpha isoform 2	68303572	0	8.66667	ni	L	0	8.09394e-05	Unique to Fertile
55	mitochondrial inner membrane protein isoform 2	154354962	0	15.6667	ni	L	0	8.53497e-05	Unique to Fertile
56	phosphatidylethanolamine-binding protein 1 preproprotein	4505621	0	15.6667	ni	L	0	0.000102394	Unique to Fertile
57	UV excision repair protein RAD23 homolog B isoform 1	4506387	0	10.6667	ni	L	0	0.000114073	Unique to Fertile
58	histone H2A.Z	4504255	0	8.33333	ni	L	0	0.000125862	Unique to Fertile
59	nuclear pore glycoprotein p62	301069416	0	11.3333	ni	L	0	0.000140587	Unique to Fertile
60	iron-sulfur cluster assembly enzyme ISCU, mitochondrial isoform ISCU2 precursor	56699456	0	10.3333	ni	L	0	0.000140732	Unique to Fertile
61	serine/threonine-protein phosphatase PGAM5, mitochondrial isoform 1	281604136	0	12	ni	L	0	0.000144152	Unique to Fertile
62	26S proteasome non-ATPase regulatory subunit 11	394953908	0	13	ni	L	0	0.000167704	Unique to Fertile
63	perilipin-3 isoform 1	255958282	0	15.6667	ni	L	0	0.000186342	Unique to Fertile
64	tubulin polymerization-promoting protein family member 2	226491350	0	19.3333	ni	L	0	0.000193162	Unique to Fertile
65	testis-specific H1 histone	32401437	0	8	ni	L	0	0.000200323	Unique to Fertile
66	putative transferase CAF17, mitochondrial precursor	58197556	0	15.3333	ni	L	0	0.000213483	Unique to Fertile
67	ubiquitin carboxyl-terminal hydrolase isozyme L1	21361091	0	16.6667	ni	L	0	0.000220589	Unique to Fertile
68	lysosomal alpha-glucosidase isoform X1	530411863	0	19.3333	ni	L	0	0.000229632	Unique to Fertile
69	acyl carrier protein, mitochondrial precursor	4826852	0	14.6667	ni	L	0	0.000255248	Unique to Fertile
70	large proline-rich protein BAG6 isoform X10	578811941	0	10.6667	ni	L	0	0.000294939	Unique to Fertile
71	SET domain-containing protein 9 isoform X1	530379136	0	8	ni	L	0	0.00029842	Unique to Fertile
72	lysozyme-like protein 1	73390143	0	8	ni	L	0	0.000307876	Unique to Fertile
73	acylpyruvase FAHD1, mitochondrial isoform 2	13654274	0	8	ni	L	0	0.000372574	Unique to Fertile
74	60S ribosomal protein L6	16753227	0	8.33333	ni	L	0	0.000377698	Unique to Fertile
75	mimitin, mitochondrial	29789409	0	9.33333	ni	L	0	0.000397256	Unique to Fertile
76	A-kinase anchor protein 3	507834051	0	14.3333	ni	L	0	0.000399472	Unique to Fertile
77	26S protease regulatory subunit 7 isoform 1	4506209	0	15	ni	L	0	0.000425943	Unique to Fertile
78	importin subunit alpha-3	4504901	0	12.3333	ni	L	0	0.000524623	Unique to Fertile
79	LETM1 domain-containing protein 1 isoform 3	344030197	0	8.33333	ni	L	0	0.00054216	Unique to Fertile
80	alpha-aminoadipic semialdehyde synthase, mitochondrial	13027640	0	15.6667	ni	L	0	0.000560727	Unique to Fertile
81	SUN domain-containing protein 3 isoform 2	547235103	0	12.3333	ni	L	0	0.0006037	Unique to Fertile
82	complement decay-accelerating factor isoform 2 precursor	168693643	0	15	ni	L	0	0.000608639	Unique to Fertile
83	leucine zipper transcription factor-like protein 1 isoform 1	9966793	0	13.3333	ni	L	0	0.000674566	Unique to Fertile
84	C-Myc-binding protein	57242777	0	8	ni	L	0	0.000679075	Unique to Fertile
85	26S protease regulatory subunit 6B isoform 1	5729991	0	16	ni	L	0	0.000697934	Unique to Fertile
86	histidine triad nucleotide-binding protein 1	4885413	0	14.6667	ni	L	0	0.00073124	Unique to Fertile
87	matrix-remodeling-associated protein 5 precursor	139948432	0	17.3333	ni	L	0	0.000770361	Unique to Fertile
88	trans-2-enoyl-CoA reductase, mitochondrial isoform X1	530361129	0	8	ni	L	0	0.000788537	Unique to Fertile
89	protein canopy homolog 3 precursor	33942072	0	8	ni	L	0	0.000830779	Unique to Fertile
90	outer dense fiber protein 2 isoform 11	334278913	0	12.3333	ni	L	0	0.000839905	Unique to Fertile
91	AP-1 complex subunit beta-1 isoform b	260436860	0	8.66667	ni	L	0	0.000892398	Unique to Fertile
92	N-acetyl-D-glucosamine kinase	295844834	0	8	ni	L	0	0.000937531	Unique to Fertile
93	succinyl-CoA ligase [ADP/GDP-forming] subunit alpha, mitochondrial precursor	109452591	0	19.6667	ni	L	0	0.000985993	Unique to Fertile
94	electron transfer flavoprotein-ubiquinone oxidoreductase, mitochondrial isoform 2	528881081	0	15	ni	L	0	0.000987	Unique to Fertile
95	sarcoplasmic/endoplasmic reticulum calcium ATPase 2 isoform b	24638454	0	10.6667	ni	L	0	0.00101688	Unique to Fertile
96	ras GTPase-activating-like protein IQGAP2 isoform 1	116089337	0	15	ni	L	0	0.00103919	Unique to Fertile
97	60S ribosomal protein L18 isoform 2	395132436	0	12.3333	ni	L	0	0.00104361	Unique to Fertile
98	phosphatidylinositol transfer protein alpha isoform	5453908	0	8.66667	ni	L	0	0.00104848	Unique to Fertile
99	BAG family molecular chaperone regulator 5 isoform a	62548856	0	19	ni	L	0	0.0010897	Unique to Fertile
100	actin-related protein T3	221139714	0	12	ni	L	0	0.00122402	Unique to Fertile
101	uncharacterized protein C7orf61	51972226	0	10	ni	L	0	0.00127745	Unique to Fertile
102	testisin isoform 2 preproprotein	21614531	0	8.66667	ni	L	0	0.00133349	Unique to Fertile
103	bifunctional glutamate/proline--tRNA ligase	62241042	0	13.6667	ni	L	0	0.00137388	Unique to Fertile
104	60S ribosomal protein L13 isoform 1	15431295	0	8	ni	L	0	0.00161513	Unique to Fertile
105	profilin-3	71274140	0	11	ni	L	0	0.00169749	Unique to Fertile
106	isocitrate dehydrogenase [NAD] subunit gamma, mitochondrial isoform a precursor	4758582	0	12.6667	ni	L	0	0.00172735	Unique to Fertile
107	oligoribonuclease, mitochondrial precursor	224496106	0	8	ni	L	0	0.00186383	Unique to Fertile
108	dihydropteridine reductase	208973246	0	11.3333	ni	L	0	0.00193542	Unique to Fertile
109	pyruvate dehydrogenase E1 component subunit alpha, somatic form, mitochondrial isoform 2 precursor	291084742	0	10.3333	ni	L	0	0.0019982	Unique to Fertile
110	S-formylglutathione hydrolase isoform X1	530402140	0	13	ni	L	0	0.00239101	Unique to Fertile
111	nucleoporin NUP53 isoform a	31982904	0	12.3333	ni	L	0	0.00244858	Unique to Fertile
112	rab GDP dissociation inhibitor alpha	4503971	0	12	ni	L	0	0.0027745	Unique to Fertile
113	dynein light chain Tctex-type 1	5730085	0	12	ni	L	0	0.00280814	Unique to Fertile
114	peptidyl-prolyl cis-trans isomerase F, mitochondrial precursor	5031987	0	10	ni	L	0	0.00281361	Unique to Fertile
115	aspartyl aminopeptidase	156416028	0	14.3333	ni	L	0	0.00281903	Unique to Fertile
116	eukaryotic translation elongation factor 1 epsilon-1 isoform 1	4758862	0	8.66667	ni	L	0	0.00319416	Unique to Fertile
117	AFG3-like protein 2	300192933	0	10.3333	ni	L	0	0.0034493	Unique to Fertile
118	calmin isoform X5	578826129	0	11.6667	ni	L	0	0.00388605	Unique to Fertile
119	BRI3-binding protein precursor	19923665	0	8.66667	ni	L	0	0.00426957	Unique to Fertile
120	transmembrane protein 89 precursor	56847630	0	10.3333	ni	L	0	0.00427083	Unique to Fertile
121	lanC-like protein 1 isoform X1	530369695	0	8.33333	ni	L	0	0.0057955	Unique to Fertile
122	2-hydroxyacyl-CoA lyase 1 isoform d	548923675	0	8.33333	ni	L	0	0.00580244	Unique to Fertile
123	pyruvate dehydrogenase protein X component, mitochondrial isoform 1 precursor	203098753	0	12.3333	ni	L	0	0.00779503	Unique to Fertile
124	ERO1-like protein beta precursor	239582761	0	14.6667	ni	L	0	0.0085058	Unique to Fertile
125	3-oxoacyl-[acyl-carrier-protein] synthase, mitochondrial isoform X1	578806264	0	10.3333	ni	L	0	0.00881097	Unique to Fertile
126	casein kinase II subunit beta isoform 1	23503295	0	12	ni	L	0	0.00884588	Unique to Fertile
127	atlastin-3 isoform 1	45827806	0	16.3333	ni	L	0	0.00919595	Unique to Fertile
128	methionine--tRNA ligase, cytoplasmic	14043022	0	7.33333	ni	VL	0	3.48351e-08	Unique to Fertile
129	acyl-protein thioesterase 1 isoform 3	525342581	0	5.66667	ni	VL	0	2.80214e-07	Unique to Fertile
130	mitochondrial fission 1 protein	151108473	0	5.66667	ni	VL	0	2.41181e-06	Unique to Fertile
131	insulin-like peptide INSL6 precursor	38569396	0	3	ni	VL	0	4.38349e-06	Unique to Fertile
132	up-regulated during skeletal muscle growth protein 5	14249376	0	6	ni	VL	0	4.73557e-06	Unique to Fertile
133	sodium/potassium-transporting ATPase subunit alpha-3 isoform 1	22748667	0	3	ni	VL	0	7.96622e-06	Unique to Fertile
134	vesicle transport protein GOT1B	7705636	0	6	ni	VL	0	8.22194e-06	Unique to Fertile
135	aminoacyl tRNA synthase complex-interacting multifunctional protein 1 isoform a precursor	45006986	0	4.66667	ni	VL	0	9.59888e-06	Unique to Fertile
136	dihydroorotate dehydrogenase (quinone), mitochondrial	45006951	0	6	ni	VL	0	1.35862e-05	Unique to Fertile
137	heat shock protein 105 isoform 1	42544159	0	6.66667	ni	VL	0	2.88658e-05	Unique to Fertile
138	peptidyl-tRNA hydrolase 2, mitochondrial isoform X1	578831047	0	2.33333	ni	VL	0	3.41745e-05	Unique to Fertile
139	phospholysine phosphohistidine inorganic pyrophosphate phosphatase isoform 1	269847098	0	6	ni	VL	0	3.89524e-05	Unique to Fertile
140	grpE protein homolog 1, mitochondrial precursor	24308295	0	7	ni	VL	0	4.02825e-05	Unique to Fertile
141	protein phosphatase 1A isoform 1	10337595	0	7	ni	VL	0	4.40773e-05	Unique to Fertile
142	geranylgeranyl pyrophosphate synthase	83700220	0	7.33333	ni	VL	0	5.16205e-05	Unique to Fertile
143	ubiquitin carboxyl-terminal hydrolase 14 isoform a	4827050	0	3.33333	ni	VL	0	5.63408e-05	Unique to Fertile
144	serine protease HTRA2, mitochondrial isoform 2	21614538	0	3.66667	ni	VL	0	5.63948e-05	Unique to Fertile
145	mitochondrial carnitine/acylcarnitine carrier protein	4557403	0	6.66667	ni	VL	0	6.83745e-05	Unique to Fertile
146	transmembrane emp24 domain-containing protein 1 precursor	5803040	0	6	ni	VL	0	8.17358e-05	Unique to Fertile
147	mitochondrial import inner membrane translocase subunit Tim9	6912714	0	6	ni	VL	0	0.000115339	Unique to Fertile
148	small nuclear ribonucleoprotein Sm D2 isoform 2	237649049	0	6	ni	VL	0	0.000117021	Unique to Fertile
149	endoplasmic reticulum-Golgi intermediate compartment protein 3 isoform a	38327615	0	6	ni	VL	0	0.000136777	Unique to Fertile
150	platelet-activating factor acetylhydrolase IB subunit gamma	225543097	0	3	ni	VL	0	0.000141579	Unique to Fertile
151	ADP-ribosylation factor 6	4502211	0	5	ni	VL	0	0.000180674	Unique to Fertile
152	40S ribosomal protein S8	4506743	0	6	ni	VL	0	0.000216406	Unique to Fertile
153	dynein light chain roadblock-type 2	18702323	0	6.33333	ni	VL	0	0.000240743	Unique to Fertile
154	methylosome protein 50	13129110	0	3.33333	ni	VL	0	0.000260886	Unique to Fertile
155	tubulin alpha-1B chain	57013276	0	4.66667	ni	VL	0	0.000262025	Unique to Fertile
156	serotransferrin precursor	4557871	0	4.66667	ni	VL	0	0.000264418	Unique to Fertile
157	acetyl-CoA acetyltransferase, cytosolic	148539872	0	5	ni	VL	0	0.000287161	Unique to Fertile
158	cytochrome c oxidase protein 20 homolog	37620210	0	6.33333	ni	VL	0	0.000295931	Unique to Fertile
159	mitochondrial coenzyme A transporter SLC25A42 isoform X1	530414750	0	5.66667	ni	VL	0	0.000307696	Unique to Fertile
160	nuclear pore membrane glycoprotein 210 precursor	27477134	0	5.33333	ni	VL	0	0.000324258	Unique to Fertile
161	NADH dehydrogenase [ubiquinone] 1 alpha subcomplex assembly factor 3 isoform a precursor	41327781	0	6.66667	ni	VL	0	0.00032679	Unique to Fertile
162	V-type proton ATPase subunit d 1	19913432	0	3.33333	ni	VL	0	0.000327621	Unique to Fertile
163	nucleosome assembly protein 1-like 1	21327708	0	5.33333	ni	VL	0	0.000329831	Unique to Fertile
164	fructose-bisphosphate aldolase C	4885063	0	6.66667	ni	VL	0	0.000338251	Unique to Fertile
165	voltage-dependent calcium channel subunit alpha-2/delta-2 isoform X1	530373385	0	5	ni	VL	0	0.000338602	Unique to Fertile
166	uncharacterized protein C10orf107 isoform X4	578819068	0	3.33333	ni	VL	0	0.000390257	Unique to Fertile
167	40S ribosomal protein S2	15055539	0	6.66667	ni	VL	0	0.000428383	Unique to Fertile
168	DAZ-associated protein 1 isoform X2	530425187	0	4	ni	VL	0	0.000444076	Unique to Fertile
169	CDGSH iron-sulfur domain-containing protein 2	56605994	0	4	ni	VL	0	0.000447715	Unique to Fertile
170	NADH dehydrogenase [ubiquinone] 1 beta subcomplex subunit 11, mitochondrial isoform 1	20127561	0	4.66667	ni	VL	0	0.000457904	Unique to Fertile
171	glutaredoxin-related protein 5, mitochondrial precursor	42516576	0	7.33333	ni	VL	0	0.000463938	Unique to Fertile
172	choline transporter-like protein 5 isoform B	194239633	0	7.66667	ni	VL	0	0.000566926	Unique to Fertile
173	succinate-semialdehyde dehydrogenase, mitochondrial isoform 1 precursor	25777721	0	6	ni	VL	0	0.000599149	Unique to Fertile
174	alpha-N-acetylgalactosaminidase isoform X1	530420112	0	4.33333	ni	VL	0	0.000643416	Unique to Fertile
175	armadillo repeat-containing protein 3 isoform 1	189409124	0	7.66667	ni	VL	0	0.000652397	Unique to Fertile
176	NADH dehydrogenase [ubiquinone] 1 subunit C2 isoform 1	4758784	0	3.33333	ni	VL	0	0.000685776	Unique to Fertile
177	low molecular weight phosphotyrosine protein phosphatase isoform c	4757714	0	5.66667	ni	VL	0	0.000689572	Unique to Fertile
178	transmembrane emp24 domain-containing protein 5 isoform 1 precursor	282165814	0	6	ni	VL	0	0.000700989	Unique to Fertile
179	aquaporin-7 isoform X1	530389886	0	6.66667	ni	VL	0	0.000765987	Unique to Fertile
180	glycerol-3-phosphate dehydrogenase, mitochondrial isoform X1	530370176	0	3.66667	ni	VL	0	0.000957316	Unique to Fertile
181	NADH dehydrogenase [ubiquinone] iron-sulfur protein 6, mitochondrial precursor	4758792	0	6	ni	VL	0	0.000977747	Unique to Fertile
182	mitochondrial inner membrane organizing system protein 1 isoform a	73912720	0	6	ni	VL	0	0.00097917	Unique to Fertile
183	isoleucine--tRNA ligase, mitochondrial precursor	46852147	0.333333	100.333	VL	H	0.002334	1.45802e-07	Underexpressed
184	nuclear pore membrane glycoprotein 210-like isoform 1 precursor	117414168	0.333333	65	VL	M	0.00641834	1.25596e-06	Underexpressed
185	nuclear pore complex protein Nup93 isoform X1	530424559	0.333333	48	VL	M	0.0156986	5.34145e-05	Underexpressed
186	2-oxoglutarate dehydrogenase, mitochondrial isoform 1 precursor	51873036	1	101.333	VL	H	0.0159825	7.63355e-06	Underexpressed
187	plasma membrane calcium-transporting ATPase 4 isoform 4b	48255957	1	68	VL	M	0.017181	9.79031e-06	Underexpressed
188	valine--tRNA ligase isoform X1	530382523	1	86	VL	H	0.0181279	6.76023e-07	Underexpressed
189	adenylate kinase 2, mitochondrial isoform b	7524346	0.333333	22	VL	M	0.0291582	0.00146391	Underexpressed
190	26S protease regulatory subunit 8 isoform 1	24497435	0.333333	35.3333	VL	M	0.0303096	0.000986227	Underexpressed
191	nucleoporin p54 isoform 1	26051237	0.333333	22.6667	VL	M	0.0332587	0.000825078	Underexpressed
192	EF-hand calcium-binding domain-containing protein 14	7662160	0.333333	26	VL	M	0.0348469	4.31311e-05	Underexpressed
193	heat shock 70 protein 4	38327039	0.333333	32.3333	VL	M	0.0366684	4.36078e-05	Underexpressed
194	four and a half LIM domains protein 1 isoform 5	228480205	0.333333	22.3333	VL	M	0.038582	0.00670217	Underexpressed
195	mitochondria-eating protein	21687119	0.333333	19.3333	VL	L	0.0394777	0.00587089	Underexpressed
196	sodium/potassium-transporting ATPase subunit alpha-1 isoform a	21361181	0.333333	27.3333	VL	M	0.039777	0.000567988	Underexpressed
197	elongation factor Ts, mitochondrial isoform 2 precursor	171846268	0.333333	16.3333	VL	L	0.0399741	4.88104e-05	Underexpressed
198	26S protease regulatory subunit 6A	21361144	0.333333	22	VL	M	0.0413984	0.000791896	Underexpressed
199	importin-5 isoform X2	530423350	1.33333	37.6667	VL	M	0.0437359	7.82813e-05	Underexpressed
200	cytochrome b-c1 complex subunit 7 isoform 1	5454152	0.333333	25	VL	M	0.0455115	8.32154e-05	Underexpressed
201	syntaxin-12	28933465	0.333333	13.6667	VL	L	0.0472114	0.00280511	Underexpressed
202	dnaJ homolog subfamily B member 11 precursor	7706495	0.333333	22.3333	VL	M	0.0493292	0.000242351	Underexpressed
203	NADH dehydrogenase [ubiquinone] flavoprotein 1, mitochondrial isoform 1 precursor	20149568	0.666667	32.3333	VL	M	0.0504653	0.000495819	Underexpressed
204	proteasome activator complex subunit 4	163644283	2.66667	53.3333	VL	M	0.0508537	1.77749e-05	Underexpressed
205	translin-associated protein X	5174731	0.333333	12.6667	VL	L	0.0509545	0.00146944	Underexpressed
206	oxidoreductase HTATIP2 isoform a precursor	148728166	0.333333	12.3333	VL	L	0.0528302	0.00014041	Underexpressed
207	calcium-binding mitochondrial carrier protein Aralar2 isoform 1	237649019	1	44.6667	VL	M	0.0555639	3.56227e-05	Underexpressed
208	puromycin-sensitive aminopeptidase	158937236	1.33333	82	VL	H	0.0565217	1.10871e-05	Underexpressed
209	histone H1t	20544168	0.333333	18.6667	VL	L	0.0618661	0.000138912	Underexpressed
210	cullin-3 isoform X1	578805029	3.33333	91	VL	H	0.0653821	2.52068e-05	Underexpressed
211	dolichyldiphosphatase 1 isoform a	30794376	0.333333	4	VL	VL	0.0676269	0.000351315	Underexpressed
212	ras-related protein Ral-A precursor	33946329	0.333333	9.66667	VL	L	0.0681564	0.00183663	Underexpressed
213	lysine--tRNA ligase isoform 1	194272210	1	33.3333	VL	M	0.0700275	0.00132626	Underexpressed
214	enoyl-CoA delta isomerase 2, mitochondrial isoform 2	260274832	1	43.6667	VL	M	0.071085	0.000621903	Underexpressed
215	epimerase family protein SDR39U1 isoform 1	116812630	0.666667	18	VL	L	0.0728238	0.000725261	Underexpressed
216	choline dehydrogenase, mitochondrial	217272839	0.666667	21	VL	M	0.0733333	0.000628768	Underexpressed
217	phosphoglycolate phosphatase	108796653	0.666667	27.3333	VL	M	0.0742033	4.59205e-05	Underexpressed
218	phosphoglycerate mutase 1	4505753	0.666667	20	VL	M	0.0766911	0.000868139	Underexpressed
219	elongation factor 1-delta isoform 1	304555581	1	29.6667	VL	M	0.0790123	0.000598484	Underexpressed
220	uncharacterized protein KIAA1683 isoform X1	530415216	0.333333	10.6667	VL	L	0.0808081	0.00035051	Underexpressed
221	endophilin-B1 isoform 2	331284170	0.666667	16	VL	L	0.0809524	0.00517258	Underexpressed
222	dynein heavy chain 17, axonemal	256542310	1	32	VL	M	0.0824363	0.000803832	Underexpressed
223	dynein heavy chain 8, axonemal isoform X1	578811443	7	217	VL	H	0.0832897	3.28039e-06	Underexpressed
224	extracellular matrix protein 1 isoform 3 precursor	322302700	0.666667	16	VL	L	0.0874794	0.000670186	Underexpressed
225	glucosamine-6-phosphate isomerase 2 isoform 1	19923881	0.666667	14.6667	VL	L	0.09	0.00265644	Underexpressed
226	growth/differentiation factor 15 precursor	153792495	0.333333	11	VL	L	0.0900393	0.000657383	Underexpressed
227	NADH dehydrogenase [ubiquinone] iron-sulfur protein 7, mitochondrial	187281616	0.666667	11	VL	L	0.0909843	0.00294669	Underexpressed
228	actin-related protein T2	29893808	1.33333	40.3333	VL	M	0.0911818	0.000998324	Underexpressed
229	mRNA export factor isoform X1	530418460	0.666667	21.3333	VL	M	0.0918075	0.00691435	Underexpressed
230	dnaJ homolog subfamily C member 3 precursor	5453980	0.333333	8.66667	VL	L	0.0936599	0.00103777	Underexpressed
231	carboxypeptidase B preproprotein	54607080	0.333333	9.33333	VL	L	0.0939578	0.00653305	Underexpressed
232	L-amino-acid oxidase isoform 2 precursor	384381475	3.66667	96.6667	VL	H	0.094625	0.000137301	Underexpressed
233	glycine--tRNA ligase precursor	116805340	1	25	VL	M	0.0947291	0.00454979	Underexpressed
234	WAP four-disulfide core domain protein 8 isoform X1	530418513	1.66667	30.3333	VL	M	0.0951228	0.000778078	Underexpressed
235	NADH dehydrogenase [ubiquinone] 1 alpha subcomplex subunit 2 isoform 1	4505355	0.333333	12.3333	VL	L	0.0957009	0.00293119	Underexpressed
236	maestro heat-like repeat-containing protein family member 7	223278410	0.333333	11.3333	VL	L	0.0992806	0.00186392	Underexpressed
237	izumo sperm-egg fusion protein 3 precursor	411147390	1.33333	23.3333	VL	M	0.0999422	0.00392115	Underexpressed
238	ethanolamine-phosphate cytidylyltransferase isoform X1	530413559	1	26	VL	M	0.100823	0.000781305	Underexpressed
239	tryptophan--tRNA ligase, cytoplasmic isoform X4	578826102	0.666667	17.3333	VL	L	0.105621	0.000541102	Underexpressed
240	calcium-binding tyrosine phosphorylation-regulated protein isoform a	24797108	5.33333	68	VL	M	0.105665	9.88934e-05	Underexpressed
241	inorganic pyrophosphatase 2, mitochondrial isoform 1 precursor	29171702	1	25	VL	M	0.106079	0.00242797	Underexpressed
242	probable serine carboxypeptidase CPVL precursor	83641874	1.66667	38.3333	VL	M	0.107157	0.00051442	Underexpressed
243	sperm acrosome-associated protein 5 precursor	120952755	2	57.3333	VL	M	0.10953	7.95527e-05	Underexpressed
244	prostate and testis expressed protein 2 precursor	47086459	0.333333	10.3333	VL	L	0.109575	0.00240237	Underexpressed
245	transcription elongation factor B polypeptide 1 isoform a	325652033	0.333333	8.66667	VL	L	0.113855	0.00596277	Underexpressed
246	dehydrogenase/reductase SDR family member 7B isoform X1	578829832	0.666667	11.6667	VL	L	0.114376	0.0066985	Underexpressed
247	presequence protease, mitochondrial isoform 2 precursor	41352061	2	63.3333	VL	M	0.11456	0.00107172	Underexpressed
248	erlin-1 isoform X1	530392883	0.666667	17.3333	VL	L	0.116839	0.000573036	Underexpressed
249	protein NipSnap homolog 1 isoform X1	530420475	0.666667	11	VL	L	0.119106	0.00201556	Underexpressed
250	probable inactive serine protease 37 isoform 1 precursor	285394164	1	17	VL	L	0.128493	0.000338333	Underexpressed
251	ubiquitin carboxyl-terminal hydrolase isozyme L3 isoform 2	5174741	1	16.6667	VL	L	0.130967	0.00149741	Underexpressed
252	complement component 1 Q subcomponent-binding protein, mitochondrial precursor	4502491	2	33.3333	VL	M	0.131588	0.00534222	Underexpressed
253	serine protease 58 precursor	48255915	1	19	VL	L	0.132562	0.000315924	Underexpressed
254	glycerophosphodiester phosphodiesterase domain-containing protein 1 isoform 1	260763876	0.666667	15	VL	L	0.132979	0.00762143	Underexpressed
255	NADPH--cytochrome P450 reductase	127139033	1	17.6667	VL	L	0.133714	0.00179902	Underexpressed
256	NADH-ubiquinone oxidoreductase 75 subunit, mitochondrial isoform 5	316983160	4	68.6667	VL	M	0.13411	0.00033449	Underexpressed
257	ADP-ribosylation factor 1	4502201	1	12.3333	VL	L	0.14029	0.000385349	Underexpressed
258	phosphate carrier protein, mitochondrial isoform b precursor	4505775	2	12	VL	L	0.141736	0.000730332	Underexpressed
259	EGF-like repeat and discoidin I-like domain-containing protein 3 isoform 1 precursor	31317224	1.33333	22	VL	M	0.145279	0.000356272	Underexpressed
260	cysteine-rich secretory protein 2 isoform X10	530382514	1.66667	27.6667	VL	M	0.145506	0.00162783	Underexpressed
261	glyoxylate reductase/hydroxypyruvate reductase	6912396	1	19	VL	L	0.151885	0.000465221	Underexpressed
262	sodium/potassium-transporting ATPase subunit alpha-4 isoform 1	153946397	3.33333	76.6667	VL	M	0.155733	0.000670167	Underexpressed
263	26S proteasome non-ATPase regulatory subunit 7	25777615	1.66667	27.6667	VL	M	0.159562	0.00241581	Underexpressed
264	heat shock protein 75 , mitochondrial isoform 2	440309857	2.33333	32.3333	VL	M	0.166362	6.09401e-05	Underexpressed
265	actin-like protein 9	530788283	0.666667	10.3333	VL	L	0.169091	0.00863228	Underexpressed
266	transcription factor A, mitochondrial isoform 1 precursor	4507401	1.66667	21	VL	M	0.173018	0.000173587	Underexpressed
267	UDP-glucose:glycoprotein glucosyltransferase 1 isoform X1	578804601	4	78.3333	VL	M	0.174145	0.00133064	Underexpressed
268	NADH dehydrogenase [ubiquinone] iron-sulfur protein 2, mitochondrial isoform X1	530364807	3	48	VL	M	0.177435	0.00164263	Underexpressed
269	apoptosis-inducing factor 1, mitochondrial isoform 1 precursor	4757732	3	38	VL	M	0.183201	0.00215213	Underexpressed
270	deoxyuridine 5'-triphosphate nucleotidohydrolase, mitochondrial isoform 1 precursor	70906441	1.66667	15.6667	VL	L	0.185417	0.000413615	Underexpressed
271	succinate dehydrogenase cytochrome b560 subunit, mitochondrial isoform 1 precursor	4506863	0.666667	11.6667	VL	L	0.186188	0.00175628	Underexpressed
272	chitinase domain-containing protein 1 isoform a precursor	218083142	2	30.3333	VL	M	0.18851	0.00359203	Underexpressed
273	V-type proton ATPase catalytic subunit A	19913424	1.66667	20.3333	VL	M	0.190347	0.00124025	Underexpressed
274	ADP/ATP translocase 4	13775208	14	135.667	L	H	0.199886	4.17565e-05	Underexpressed
275	stromal cell-derived factor 2-like protein 1 precursor	56243533	1.66667	18	VL	L	0.204144	0.00308124	Underexpressed
276	dipeptidase 3 isoform a precursor	193211608	8.33333	71.6667	L	M	0.204673	3.50153e-05	Underexpressed
277	40S ribosomal protein SA	59859885	1	14.3333	VL	L	0.207229	0.00711512	Underexpressed
278	3-hydroxyisobutyryl-CoA hydrolase, mitochondrial isoform 1 precursor	37594471	2	25.6667	VL	M	0.211068	0.0207707	Underexpressed
279	T-complex protein 1 subunit zeta-2 isoform X1	578830267	4	42.6667	VL	M	0.211739	3.43289e-05	Underexpressed
280	histone H2A-Bbd type 2/3	63029935	1.66667	25.3333	VL	M	0.212553	0.00287148	Underexpressed
281	nitrilase homolog 1 isoform 3	297632348	3	30.3333	VL	M	0.214898	0.0083829	Underexpressed
282	superoxide dismutase [Cu-Zn]	4507149	3.66667	33	VL	M	0.214907	0.000377572	Underexpressed
283	cullin-associated NEDD8-dissociated protein 1	21361794	8	120.333	L	H	0.21709	9.52453e-05	Underexpressed
284	dynactin subunit 2 isoform 2	387527972	1.66667	19.3333	VL	L	0.217108	0.0062365	Underexpressed
285	60S ribosomal protein L10a	15431288	1	10	VL	L	0.218271	0.00620695	Underexpressed
286	3-hydroxyacyl-CoA dehydrogenase type-2 isoform 1	4758504	4.66667	54	VL	M	0.219268	0.000281295	Underexpressed
287	isocitrate dehydrogenase [NAD] subunit beta, mitochondrial isoform a precursor	28178821	3.33333	44.3333	VL	M	0.219899	0.00117434	Underexpressed
288	ropporin-1B isoform X1	530373960	2	20.6667	VL	M	0.220546	0.00103308	Underexpressed
289	ATP synthase subunit d, mitochondrial isoform a	5453559	4.66667	48	VL	M	0.222161	0.00137099	Underexpressed
290	nicastrin isoform 2	589269130	1	16	VL	L	0.226401	0.00954217	Underexpressed
291	calmegin isoform X1	578808711	3	64.6667	VL	M	0.227753	0.0058837	Underexpressed
292	hyaluronidase PH-20 isoform 1	21314606	4.66667	46.6667	VL	M	0.229695	0.0051666	Underexpressed
293	3'(2'),5'-bisphosphate nucleotidase 1 isoform X3	530365931	2.33333	28.6667	VL	M	0.241546	0.00220064	Underexpressed
294	mitochondrial pyruvate carrier 1-like protein	306922396	3	22	VL	M	0.246448	0.000170256	Underexpressed
295	redox-regulatory protein FAM213A isoform 1 precursor	148596959	1.66667	13	VL	L	0.247941	0.00268473	Underexpressed
296	uncharacterized protein C9orf9	33285006	4	31	VL	M	0.25086	5.02893e-05	Underexpressed
297	armadillo repeat-containing protein 12 isoform X1	530381603	1.33333	15	VL	L	0.251246	0.00237239	Underexpressed
298	deoxyguanosine kinase, mitochondrial isoform a precursor	18426967	3.66667	38.6667	VL	M	0.271085	0.00261007	Underexpressed
299	probable C-mannosyltransferase DPY19L2 isoform X1	578823598	9.33333	84	L	H	0.27577	0.000100438	Underexpressed
300	transmembrane protein 126A isoform 1	14150017	3.66667	21.6667	VL	M	0.288462	0.0110307	Underexpressed
301	26S protease regulatory subunit 10B	195539395	3.66667	36	VL	M	0.29105	0.000871513	Underexpressed
302	40S ribosomal protein S18	11968182	2	12.3333	VL	L	0.292838	0.000569072	Underexpressed
303	60S ribosomal protein L12	4506597	2.66667	15.6667	VL	L	0.303155	0.00397719	Underexpressed
304	serine protease inhibitor Kazal-type 2 isoform 1 precursor	413081531	2	20.3333	VL	M	0.307216	0.0183708	Underexpressed
305	protein FAM162A	49355721	3.33333	20.3333	VL	M	0.307424	0.00406683	Underexpressed
306	NADH dehydrogenase [ubiquinone] 1 alpha subcomplex subunit 8	7657369	2.66667	15.3333	VL	L	0.309981	0.00251402	Underexpressed
307	6-phosphogluconate dehydrogenase, decarboxylating	40068518	7.33333	62.6667	VL	M	0.313169	0.00091006	Underexpressed
308	10 heat shock protein, mitochondrial	4504523	1.33333	14	VL	L	0.317949	0.00393324	Underexpressed
309	histone H2AX	4504253	5.33333	47	VL	M	0.320531	0.0100215	Underexpressed
310	cytochrome b-c1 complex subunit 6, mitochondrial	83627705	2	20.3333	VL	M	0.32375	4.92847e-05	Underexpressed
311	izumo sperm-egg fusion protein 1 isoform X1	530416283	3	27	VL	M	0.323964	0.00864695	Underexpressed
312	bifunctional ATP-dependent dihydroxyacetone kinase/FAD-AMP lyase (cyclizing) isoform X3	578821282	4.33333	32.3333	VL	M	0.326159	0.00172052	Underexpressed
313	hydroxyacylglutathione hydrolase, mitochondrial isoform 1 precursor	94538322	4	27.6667	VL	M	0.328983	0.0102335	Underexpressed
314	glyceraldehyde-3-phosphate dehydrogenase, testis-specific	7657116	11.3333	95.6667	L	H	0.335802	0.000379581	Underexpressed
315	lactadherin isoform a preproprotein	167830475	6.33333	52.3333	VL	M	0.338363	0.000128104	Underexpressed
316	F-actin-capping protein subunit beta isoform 4	531990816	1.33333	10	VL	L	0.340156	0.000906734	Underexpressed
317	26S proteasome non-ATPase regulatory subunit 13 isoform 1	157502193	4	33.6667	VL	M	0.340303	0.00241478	Underexpressed
318	voltage-dependent anion-selective channel protein 3 isoform 1	25188179	2.33333	21	VL	M	0.342334	0.0187294	Underexpressed
319	T-complex protein 1 subunit gamma isoform a	63162572	13.3333	98	L	H	0.351064	0.0017136	Underexpressed
320	fragile X mental retardation 1 neighbor protein	22749199	4	22	VL	M	0.355236	0.00679618	Underexpressed
321	signal peptidase complex catalytic subunit SEC11A isoform 4	429836837	3.66667	18.6667	VL	L	0.355888	0.00488215	Underexpressed
322	fatty-acid amide hydrolase 1	166795287	6.66667	46.3333	VL	M	0.359949	0.00107202	Underexpressed
323	leucine-rich repeat-containing protein 37A3 precursor	75677612	33.6667	186	M	H	0.362998	6.75692e-05	Underexpressed
324	6-phosphofructokinase type C isoform X2	530392191	17.3333	88	L	H	0.368991	0.000362232	Underexpressed
325	isovaleryl-CoA dehydrogenase, mitochondrial isoform 1 precursor	226958412	6	46	VL	M	0.369305	0.000364859	Underexpressed
326	basigin isoform 2	38372925	2.33333	18	VL	L	0.369586	0.000569826	Underexpressed
327	single-stranded DNA-binding protein, mitochondrial precursor	374671775	7	47.6667	VL	M	0.370654	0.00073282	Underexpressed
328	tricarboxylate transport protein, mitochondrial isoform a precursor	21389315	3.66667	23.3333	VL	M	0.371257	0.0187791	Underexpressed
329	60S acidic ribosomal protein P0	4506667	3	20.6667	VL	M	0.372493	0.00135513	Underexpressed
330	tripeptidyl-peptidase 2 isoform X2	530423399	12.3333	115.333	L	H	0.373614	0.00184591	Underexpressed
331	prohibitin-2 isoform 1	221307584	6	43.6667	VL	M	0.375937	0.00455006	Underexpressed
332	dipeptidyl peptidase 2 isoform X1	530426726	3.66667	23.3333	VL	M	0.377439	0.0167554	Underexpressed
333	hypoxia up-regulated protein 1 isoform X2	530397761	53.6667	295.333	M	H	0.380835	5.30219e-05	Underexpressed
334	serine/threonine-protein phosphatase PP1-gamma catalytic subunit isoform 2	350276247	8.33333	61	L	M	0.382843	0.00100592	Underexpressed
335	calmodulin isoform X1	578826144	8.66667	41.3333	L	M	0.386822	0.000626271	Underexpressed
336	neutral alpha-glucosidase AB isoform 3 precursor	88900491	18	165.667	L	H	0.390027	0.00120271	Underexpressed
337	FUN14 domain-containing protein 2	24371248	8.66667	43.6667	L	M	0.395652	0.000265965	Underexpressed
338	protein phosphatase 1 regulatory subunit 7 isoform 1	4506013	4.33333	29.3333	VL	M	0.396499	0.00509279	Underexpressed
339	exportin-1 isoform X1	530368070	1.66667	15	VL	L	0.398333	0.00562974	Underexpressed
340	isoaspartyl peptidase/L-asparaginase	145275200	8.66667	47.3333	L	M	0.398483	0.00342209	Underexpressed
341	cytochrome c oxidase subunit 6B1	4502985	4	32.3333	VL	M	0.400375	0.0015683	Underexpressed
342	sperm-associated antigen 6 isoform 1	6912678	11.3333	72.3333	L	M	0.40512	0.0013626	Underexpressed
343	ATP synthase subunit O, mitochondrial precursor	4502303	9	49.3333	L	M	0.406221	0.00656338	Underexpressed
344	cytochrome b-c1 complex subunit Rieske, mitochondrial	163644321	7.33333	41.3333	VL	M	0.409386	2.51522e-05	Underexpressed
345	carbonic anhydrase 2	4557395	5.66667	37.3333	VL	M	0.410117	0.00120723	Underexpressed
346	phosphatidylglycerophosphatase and protein-tyrosine phosphatase 1 isoform 1	148224884	3.66667	20	VL	M	0.411826	0.00111364	Underexpressed
347	ruvB-like 2	5730023	21.3333	134.333	M	H	0.416418	0.000119142	Underexpressed
348	histidine triad nucleotide-binding protein 2, mitochondrial precursor	14211923	4.66667	22.6667	VL	M	0.419714	0.0219003	Underexpressed
349	protein-L-isoaspartate(D-aspartate) O-methyltransferase isoform 1	226530908	4	24	VL	M	0.42408	0.000307477	Underexpressed
350	electron transfer flavoprotein subunit beta isoform 1	4503609	8	49.6667	L	M	0.436762	0.00409213	Underexpressed
351	T-complex protein 1 subunit epsilon	24307939	16.3333	92	L	H	0.439053	0.000239829	Underexpressed
352	translin isoform 1	4759270	6.33333	34.6667	VL	M	0.442485	0.00509903	Underexpressed
353	NAD-dependent malic enzyme, mitochondrial isoform 1 precursor	4505145	19.6667	106.667	L	H	0.442766	0.00691023	Underexpressed
354	long-chain-fatty-acid--CoA ligase 6 isoform e	327412327	9.66667	54	L	M	0.443937	0.000339535	Underexpressed
355	cAMP-dependent protein kinase type II-alpha regulatory subunit isoform X1	530372834	19	110.333	L	H	0.450513	0.00113675	Underexpressed
356	leucine-rich repeat-containing protein 37B precursor	53829385	47.6667	225.333	M	H	0.451104	0.000273589	Underexpressed
357	carnitine O-acetyltransferase isoform 1 precursor	21618331	12	61	L	M	0.453193	0.000169616	Underexpressed
358	prenylcysteine oxidase 1 precursor	166795301	8	41.6667	L	M	0.459727	0.0236579	Underexpressed
359	izumo sperm-egg fusion protein 2 isoform X1	578833932	7	33.3333	VL	M	0.464098	0.0217114	Underexpressed
360	endoplasmic reticulum resident protein 44 precursor	52487191	5.66667	33.6667	VL	M	0.468703	0.00339636	Underexpressed
361	histone H3.1	10440560	3.66667	22.6667	VL	M	0.473554	0.0156726	Underexpressed
362	HD domain-containing protein 2	116875826	3	24.3333	VL	M	0.473601	0.0277149	Underexpressed
363	pyruvate dehydrogenase E1 component subunit beta, mitochondrial isoform 1 precursor	156564403	21.3333	120	M	H	0.490388	0.00317469	Underexpressed
364	adenylate kinase isoenzyme 1	4502011	14	64.6667	L	M	0.492734	0.0142366	Underexpressed
365	acrosin-binding protein precursor	17999524	68.6667	355.667	M	H	0.495888	3.31491e-06	Underexpressed
366	A-kinase anchor protein 4 isoform 2	21493039	22.6667	100	M	H	0.499785	0.000413883	Underexpressed
367	sperm equatorial segment protein 1 precursor	21717832	35.6667	183	M	H	0.501099	0.000763702	Underexpressed
368	lysozyme-like protein 2	73088987	5.66667	23.6667	VL	M	0.504447	0.0195106	Underexpressed
369	elongation factor 1-gamma	4503481	23	104.667	M	H	0.522961	0.000125421	Underexpressed
370	ropporin-1A isoform X1	530374814	21.6667	90	M	H	0.529878	0.0130192	Underexpressed
371	T-complex protein 1 subunit delta isoform a	38455427	24	106.667	M	H	0.53013	0.000704046	Underexpressed
372	ruvB-like 1	4506753	23	109.667	M	H	0.536966	0.000506456	Underexpressed
373	protein disulfide-isomerase A4 precursor	4758304	23.6667	96.3333	M	H	0.557546	0.00604149	Underexpressed
374	endoplasmin precursor	4507677	211.667	791.333	H	H	0.560988	5.52168e-05	Underexpressed
375	60 heat shock protein, mitochondrial isoform X1	530370277	74	310.667	M	H	0.5625	0.00252631	Underexpressed
376	tubulin beta-4B chain	5174735	45.3333	196.333	M	H	0.564845	0.0133225	Underexpressed
377	T-complex protein 1 subunit beta isoform 1	5453603	29.3333	130	M	H	0.574728	0.0216066	Underexpressed
378	succinyl-CoA ligase [ADP-forming] subunit beta, mitochondrial precursor	11321583	18	86.6667	L	H	0.597304	0.0131763	Underexpressed
379	pyruvate kinase PKM isoform c	332164775	25.3333	95	M	H	0.597904	0.00787915	Underexpressed
380	dihydrolipoyl dehydrogenase, mitochondrial isoform 1 precursor	91199540	46.3333	169	M	H	0.604336	0.00654103	Underexpressed
381	trifunctional enzyme subunit alpha, mitochondrial precursor	20127408	126.333	463.667	H	H	0.633199	0.00221722	Underexpressed
382	carnitine O-palmitoyltransferase 2, mitochondrial precursor	4503023	26	99	M	H	0.633257	0.0118739	Underexpressed
383	saccharopine dehydrogenase-like oxidoreductase	55770836	80.6667	348	H	H	0.633708	0.00219548	Underexpressed
384	cytochrome b-c1 complex subunit 1, mitochondrial precursor	46593007	29.3333	120.333	M	H	0.640385	0.0296033	Underexpressed
385	izumo sperm-egg fusion protein 4 isoform X2	530425083	34	130	M	H	0.641138	0.00246157	Underexpressed
386	cytochrome b-c1 complex subunit 2, mitochondrial precursor	50592988	32.3333	139	M	H	0.642127	0.0032243	Underexpressed
387	L-lactate dehydrogenase A-like 6B	15082234	24.3333	105.667	M	H	0.646712	0.0100701	Underexpressed
388	pyruvate dehydrogenase E1 component subunit alpha, testis-specific form, mitochondrial precursor	4885543	18.6667	80.3333	L	H	0.649411	0.00985634	Underexpressed
389	cytosol aminopeptidase	41393561	54.6667	214.667	M	H	0.662338	0.000122411	Underexpressed
390	succinate dehydrogenase [ubiquinone] flavoprotein subunit, mitochondrial	156416003	55.6667	175.333	M	H	0.666667	0.00806146	Underexpressed
391	fibronectin isoform 1 preproprotein	47132557	542.333	955.333	H	H	1.62058	8.29095e-05	Overexpressed
392	lactotransferrin isoform 1 precursor	54607120	553.333	890.667	H	H	2.00639	1.39371e-05	Overexpressed
393	gastricsin isoform 1 preproprotein	4505757	38.3333	47	M	M	2.02016	0.00682196	Overexpressed
394	actin, cytoplasmic 2	316659409	88	109	H	H	2.31545	0.000564702	Overexpressed
395	serum albumin preproprotein	4502027	136	144.333	H	H	2.38586	0.00473686	Overexpressed
396	nucleotide exchange factor SIL1 isoform X1	578810496	19.6667	22	M	M	2.40759	0.0169275	Overexpressed
397	metalloproteinase inhibitor 3 precursor	4507513	27.6667	26.3333	M	M	2.40876	0.00173686	Overexpressed
398	ribonuclease 4 precursor	4506557	11.6667	9	L	L	2.55866	0.00843444	Overexpressed
399	neprilysin	116256327	6.33333	8.66667	L	L	2.56775	0.000839353	Overexpressed
400	clusterin preproprotein	355594753	262	279.667	H	H	2.7695	4.69004e-05	Overexpressed
401	semenogelin-1 preproprotein	4506883	467.333	435.333	H	H	2.8512	0.000199611	Overexpressed
402	prostate and testis expressed protein 4 precursor	221554530	9	10.3333	L	L	2.87677	0.000345659	Overexpressed
403	dehydrogenase/reductase SDR family member 7 isoform X1	530403978	22	21	M	M	2.95322	0.00163338	Overexpressed
404	chromodomain-helicase-DNA-binding protein 2 isoform 1	118421089	19.6667	19	L	L	3.03727	0.00676971	Overexpressed
405	apolipoprotein A-I isoform X1	530398067	20	17	M	L	3.11516	0.0175448	Overexpressed
406	carboxypeptidase Z isoform 1 precursor	62388877	58.3333	47.3333	M	M	3.17558	3.74935e-05	Overexpressed
407	semenogelin-2 precursor	4506885	1017.33	793.667	H	H	3.35493	0.000120544	Overexpressed
408	beta-microseminoprotein isoform a precursor	4557036	10.3333	5.66667	L	VL	3.4589	0.000329731	Overexpressed
409	plasma serine protease inhibitor preproprotein	194018472	69	43	M	M	3.48707	0.000408373	Overexpressed
410	uncharacterized protein KIAA1109 isoform X1	530378289	11.6667	10	L	L	3.4879	3.45556e-05	Overexpressed
411	prostatic acid phosphatase isoform PAP precursor	6382064	159.333	111.667	H	H	3.65165	4.34443e-05	Overexpressed
412	apolipoprotein A-IV precursor	71773110	29.6667	22.3333	M	M	3.73499	0.00149092	Overexpressed
413	glutathione S-transferase P	4504183	13.3333	9	L	L	3.84036	0.00147534	Overexpressed
414	myeloperoxidase precursor	4557759	26.3333	16.3333	M	L	3.90466	0.000427221	Overexpressed
415	matrilin-2 isoform a precursor	62548860	8	6	L	VL	4.19048	0.00267628	Overexpressed
416	aminopeptidase N isoform X1	530407092	87.3333	70.3333	H	M	4.22554	0.000314756	Overexpressed
417	lipoprotein lipase precursor	4557727	48.3333	28	M	M	4.44338	2.76043e-05	Overexpressed
418	prolactin-inducible protein precursor	4505821	601.333	293.667	H	H	4.55251	9.31017e-05	Overexpressed
419	glycodelin isoform X2	530426623	14.6667	8.33333	L	L	4.6327	0.00111487	Overexpressed
420	nucleobindin-2 isoform X1	578820554	47.6667	25	M	M	5.05304	4.15029e-05	Overexpressed
421	neutrophil defensin 1 precursor	124248516	16.3333	8.33333	L	L	5.3838	1.24398e-05	Overexpressed
422	acid ceramidase isoform b	189011546	15	8.33333	L	L	5.51567	0.000985451	Overexpressed
423	glutamate carboxypeptidase 2 isoform 3	301500668	9	5.33333	L	VL	6.09227	0.000336511	Overexpressed
424	cathepsin B preproprotein	22538431	8.66667	4	L	VL	6.24035	3.1474e-05	Overexpressed
425	zinc-alpha-2-glycoprotein precursor	4502337	17.6667	7.66667	L	VL	6.58354	0.000609987	Overexpressed
426	alpha-1-antitrypsin precursor	189163528	11.6667	4.33333	L	VL	6.77404	6.45113e-06	Overexpressed
427	apolipoprotein B-100 precursor	105990532	11.3333	4	L	VL	6.86519	0.000710544	Overexpressed
428	annexin A2 isoform 2	50845386	17	5.33333	L	VL	9.32018	6.72024e-05	Overexpressed
429	annexin A1	4502101	14.3333	3.66667	L	VL	10.4111	0.00197902	Overexpressed
430	vimentin isoform X1	578818565	11.3333	3.33333	L	VL	10.4299	0.00195311	Overexpressed
431	phospholipase A1 member A isoform 2 precursor	332688256	17	2.66667	L	VL	11.4119	0.0065208	Overexpressed
432	prosaposin isoform b preproprotein	110224476	48.3333	10	M	L	12.6305	4.85496e-05	Overexpressed
433	dipeptidyl peptidase 4	18765694	47.3333	12.6667	M	L	13.5158	0.000658732	Overexpressed
434	gamma-glutamyltranspeptidase 1 precursor	572152963	15	2.33333	L	VL	15.5857	0.000309057	Overexpressed
435	syntenin-1 isoform 1	55749490	6	1	VL	VL	15.9036	0.000481089	Overexpressed
436	cystatin-S precursor	4503109	20	3.66667	M	VL	16.9534	3.57423e-06	Overexpressed
437	platelet-activating factor acetylhydrolase precursor	189095271	6	1	VL	VL	18.1616	4.74808e-05	Overexpressed
438	prostate-specific antigen isoform 1 preproprotein	4502173	288	41.6667	H	M	19.3659	4.19066e-07	Overexpressed
439	plastin-2 isoform X2	530402335	12.3333	1.66667	L	VL	20.166	0.00705072	Overexpressed
440	laminin subunit alpha-5 isoform X1	578835999	17.6667	8.33333	L	L	21.7949	0.00178552	Overexpressed
441	ADP-ribosyl cyclase 1	38454326	5.33333	0.666667	VL	VL	24.006	0.000245966	Overexpressed
442	olfactomedin-4 precursor	32313593	6.66667	0.666667	VL	VL	27.8355	0.000342143	Overexpressed
443	peroxiredoxin-2	32189392	13.6667	1.33333	L	VL	29.8579	0.000266411	Overexpressed
444	kalirin isoform 1	148839466	9	1.33333	L	VL	41.1485	0.00157705	Overexpressed
445	CD63 antigen isoform A	383872447	14.3333	1	L	VL	45.7692	0.00315831	Overexpressed
446	sorbitol dehydrogenase	156627571	14.3333	0.666667	L	VL	65.343	0.00055294	Overexpressed
447	selenoprotein P isoform 2	148277022	8.33333	0.333333	L	VL	70.2098	1.53771e-05	Overexpressed
448	laminin subunit beta-2 isoform X1	530372442	51.3333	1.66667	M	VL	86.5297	3.07617e-05	Overexpressed
449	BPI fold-containing family B member 1 precursor	40807482	35.6667	1	M	VL	95.8005	2.20131e-05	Overexpressed
450	annexin A4	4502105	22.3333	0.333333	M	VL	153.967	2.70854e-06	Overexpressed
451	CD177 antigen precursor	110735433	19	0.333333	L	VL	182.301	1.77453e-05	Overexpressed
452	mucin-5B precursor	301172750	47.6667	0.666667	M	VL	208.882	3.77352e-06	Overexpressed
453	mesothelin isoform X1	530407442	12.6667	0	L	ni	Cancer group only	3.7484e-08	Unique to Cancer
454	mucin-6 isoform X1, partial	578841512	17.3333	0	L	ni	Cancer group only	1.45141e-06	Unique to Cancer
455	protein OS-9 isoform X1	530399626	19.6667	0	L	ni	Cancer group only	0.00174863	Unique to Cancer
456	desmoglein-1 preproprotein	119703744	3.33333	0	VL	ni	Cancer group only	8.16326e-06	Unique to Cancer
457	hemoglobin subunit beta	4504349	5	0	VL	ni	Cancer group only	4.6422e-05	Unique to Cancer
458	tripeptidyl-peptidase 1 preproprotein	5729770	2	0	VL	ni	Cancer group only	8.19374e-05	Unique to Cancer
459	hornerin	57864582	7.33333	0	VL	ni	Cancer group only	0.000105243	Unique to Cancer
460	alpha-2-antiplasmin isoform X6	530410446	5.33333	0	VL	ni	Cancer group only	0.000221674	Unique to Cancer
H: high; L: low; M: medium; ni: not identified; NSAF: normalized spectral abundance factor; OE: overexpressed; SC: spectral counts; UE: underexpressed; VL: very low
